# Supplementary material
Source: publisher figshare collection journal article supplement (https://asha.figshare.com/articles/dataset/_/12269081)
Supplement: Supplementary file 2 [file 1]

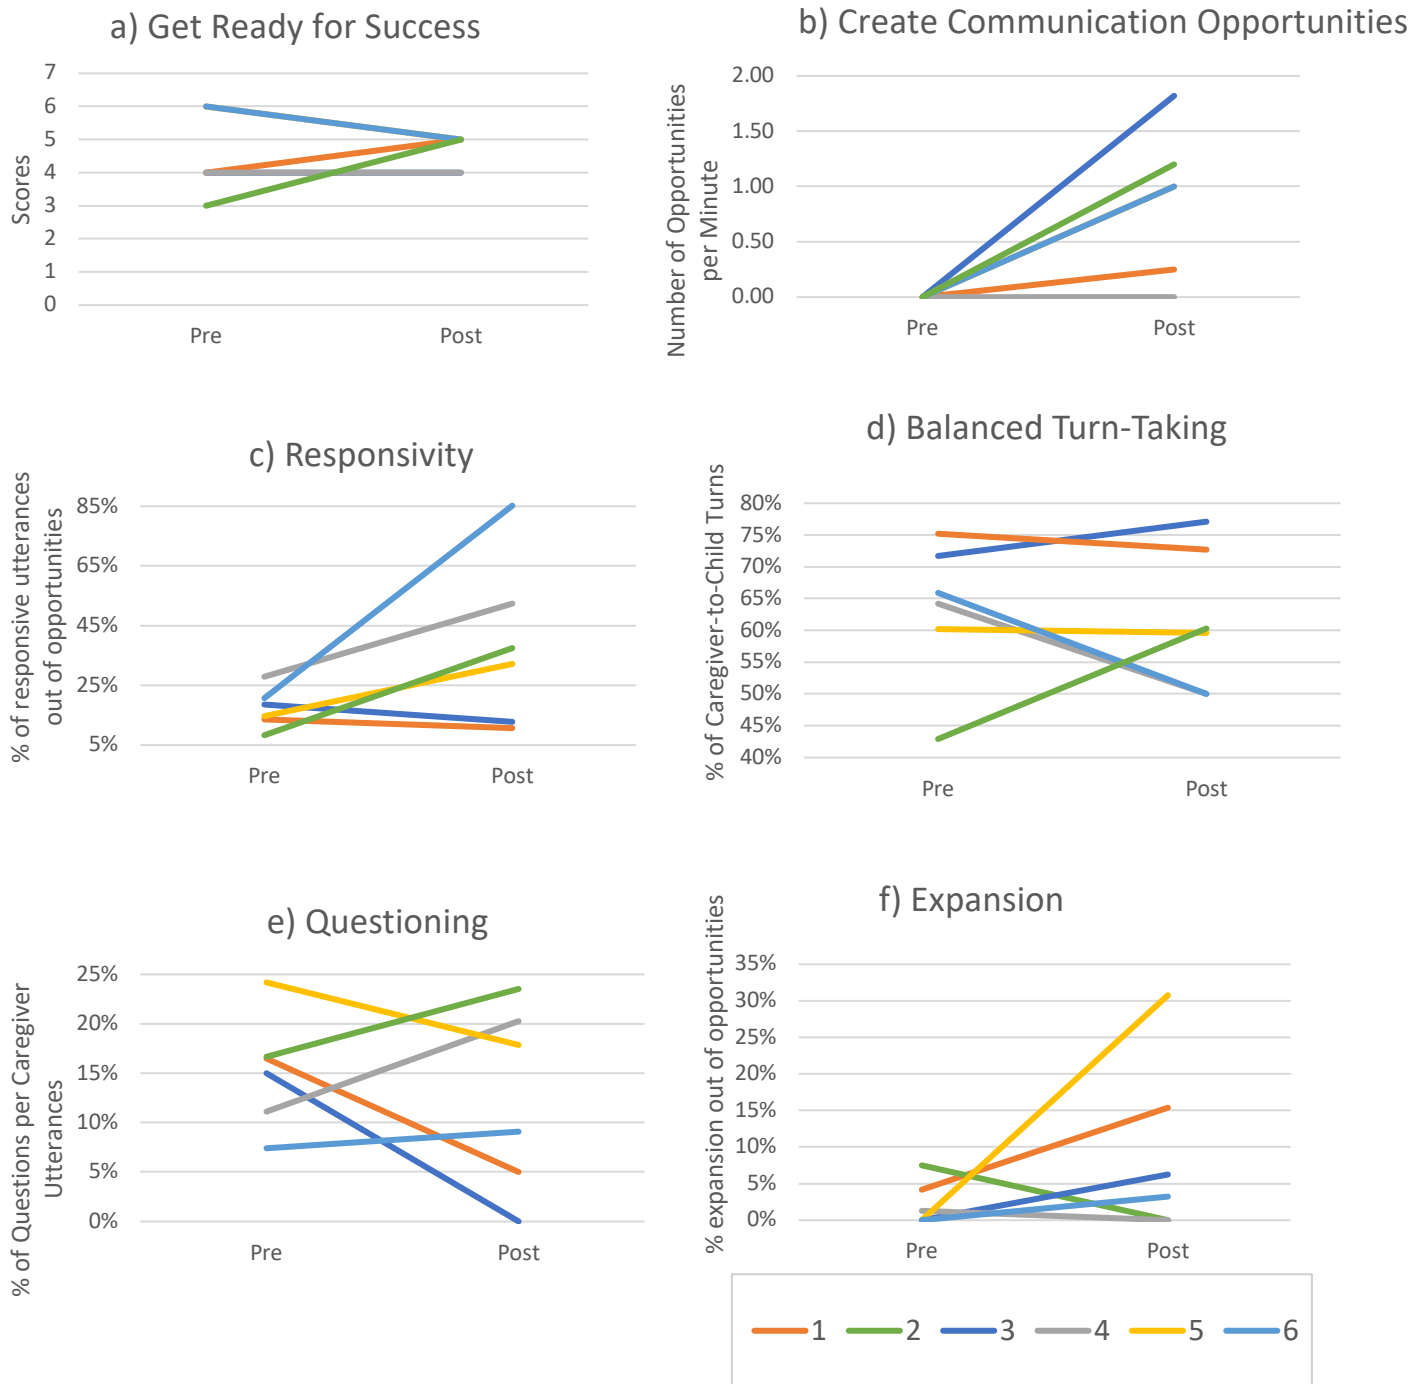

Figure 1. Changes in caregivers' communicative strategies over time. *Note.* a) increase in the use of Get Ready for Success strategies are desirable; The data from caregiver 5 and 6 overlap here; b) increases in use of Create Communication Opportunities strategies are desirable; c) increases in percentage of responsivity are desirable; d) balanced turn-taking percentages near 50% are desirable; e) decreases in use of yes/no and test questions are desirable; and f) increase in use of expansion strategies are desirable.
