# Supplementary material
Source: publisher figshare collection journal article supplement (https://asha.figshare.com/articles/dataset/_/12269081)

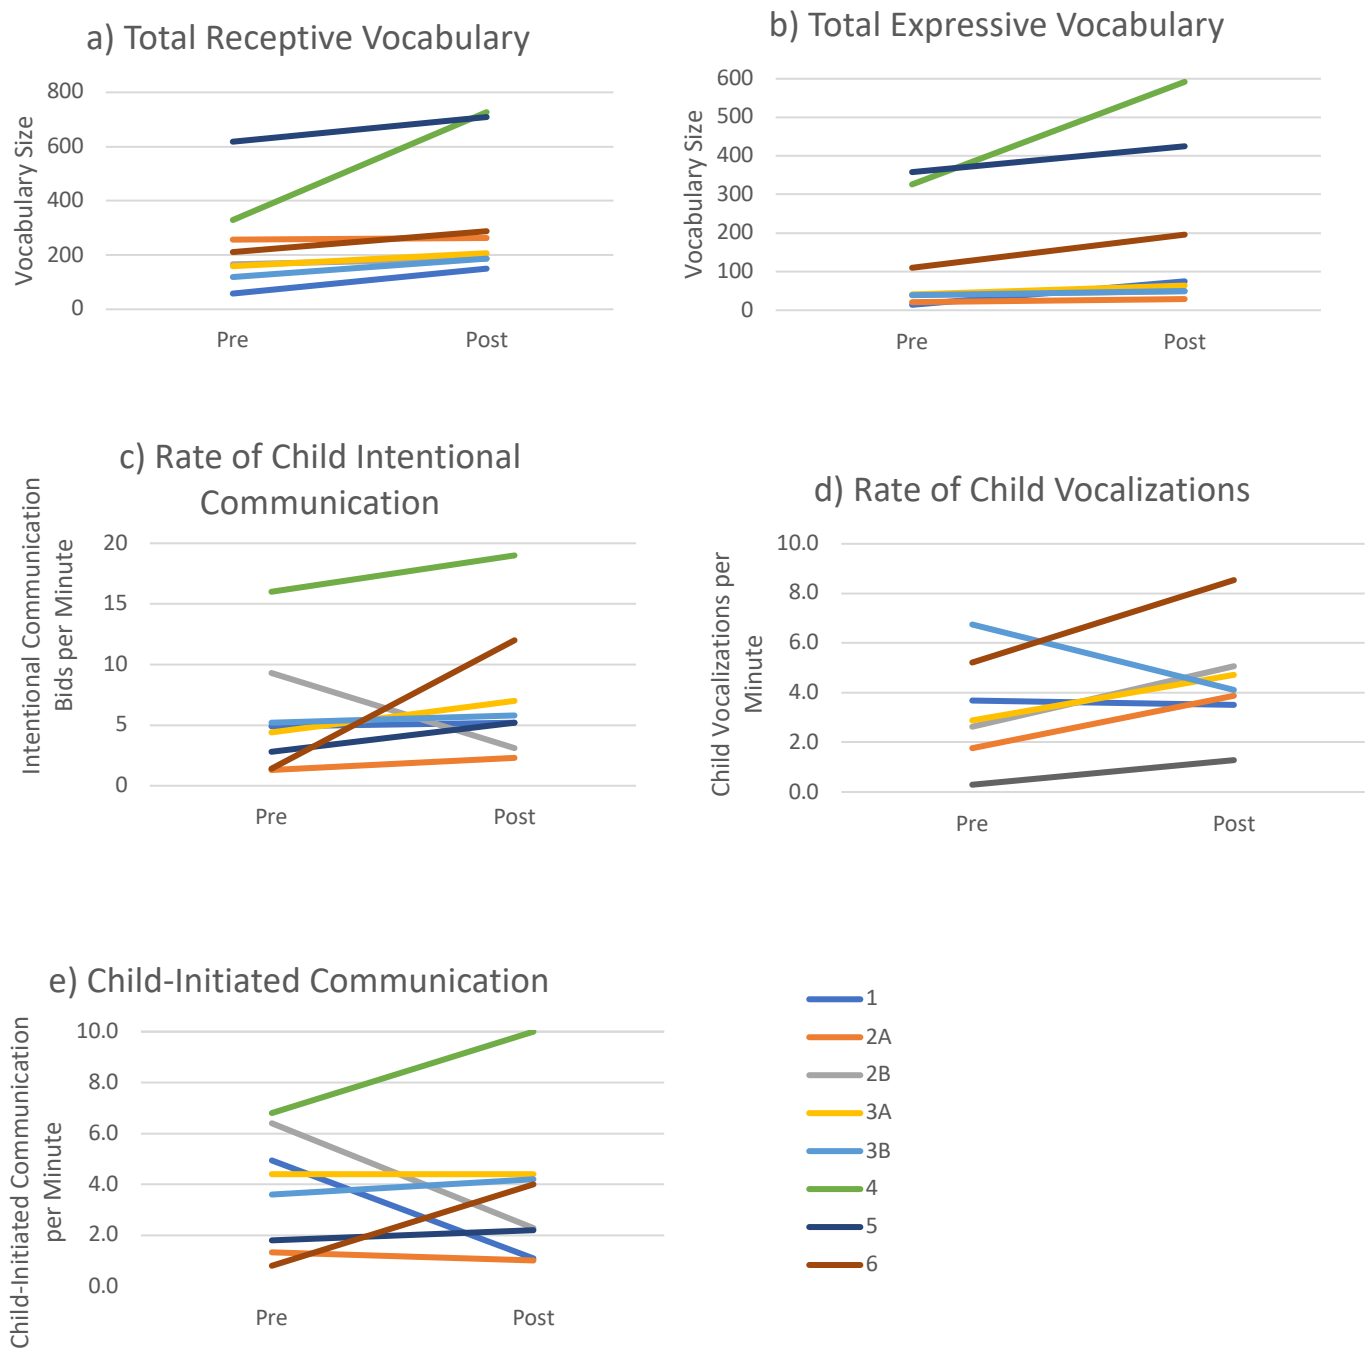

Figure 2. Changes in children's communication skills over time.

Supplement: Supplementary file 1 [file 1]
